# Modulation of Wnt5a Expression by Periodontopathic Bacteria

Hiromi Nanbara<sup>1,2</sup>, Nawarat Wara-aswapati<sup>3</sup>, Toshiyuki Nagasawa<sup>1<sup>‡a</sup></sup>, Yasuhiro Yoshida<sup>4\*</sup>, Reiko Yashiro<sup>1<sup>‡b</sup></sup>, Yukiko Bando<sup>1<sup>‡c</sup></sup>, Hiroaki Kobayashi<sup>1</sup>, Janjura Khongcharoensuk<sup>3</sup>, Doosadee Hormdee<sup>3</sup>, Waranuch Pitiphat<sup>5</sup>, Jason A. Boch<sup>6</sup>, Yuichi Izumi<sup>1,2</sup>

**1** Department of Periodontology, Tokyo Medical and Dental University, Tokyo, Japan, **2** Global Center of Excellence Program, International Research Center for Molecular Science in Tooth and Bone Diseases, Tokyo Medical and Dental University, Tokyo, Japan, **3** Department of Periodontology, Faculty of Dentistry, Khon Kaen University, Khon Kaen, Thailand, **4** Department of Immunology, School of Medicine, University of Occupational and Environmental Health, Fukuoka, Japan, **5** Department of Community Dentistry, Faculty of Dentistry, Khon Kaen University, Khon Kaen, Thailand, **6** Department of Oral Medicine, Infection and Immunity, Harvard School of Dental Medicine, Boston, Massachusetts, United States of America

## Abstract

Wingless proteins, termed Wnt, are involved in embryonic development, blood cell differentiation, and tumorigenesis. In mammalian hematopoiesis, Wnt signaling is essential for stem-cell homeostasis and lymphocyte differentiation. Recent studies have suggested that these molecules are associated with cardiovascular diseases, rheumatoid arthritis, and osteoarthritis. Furthermore, Wnt5a signaling is essential for the general inflammatory response of human macrophages. Periodontitis is a chronic inflammatory disease caused by gram-negative periodontopathic bacteria and the resultant host immune response. Periodontitis is characterized by loss of tooth-supporting structures and alveolar bone resorption. There have been no previous reports on Wnt5a expression in periodontitis tissue, and only few study reported the molecular mechanisms of Wnt5a expression in LPS-stimulated monocytic cells. Using RT-PCR, we demonstrated that Wnt5a mRNA expression was up-regulated in chronic periodontitis tissue as compared to healthy control tissue. *P. gingivalis* LPS induced Wnt5a mRNA in the human monocytic cell line THP-1 with a peak at 4 hrs after stimulation. *P. gingivalis* LPS induced higher up-regulation of Wnt5a mRNA than *E. coli* LPS. The LPS receptors TLR2 and TLR4 were equally expressed on the surface of THP-1 cells. *P. gingivalis* LPS induced I $\kappa$ B $\alpha$  degradation and was able to increase the NF- $\kappa$ B binding activity to DNA. *P. gingivalis* LPS-induced Wnt5a expression was inhibited by NF- $\kappa$ B inhibitors, suggesting NF- $\kappa$ B involvement. Furthermore, IFN- $\gamma$  synergistically enhanced the *P. gingivalis* LPS-induced production of Wnt5a. Pharmacological investigation and siRNA experiments showed that STAT1 was important for *P. gingivalis* LPS-induced Wnt5a expression. These results suggest that the modulation of Wnt5a expression by *P. gingivalis* may play an important role in the periodontal inflammatory process and serve a target for the development of new therapies.

**Citation:** Nanbara H, Wara-aswapati N, Nagasawa T, Yoshida Y, Yashiro R, et al. (2012) Modulation of Wnt5a Expression by Periodontopathic Bacteria. PLoS ONE 7(4): e34434. doi:10.1371/journal.pone.0034434

**Editor:** Roy Martin Roop II, East Carolina University School of Medicine, United States of America

**Received:** October 28, 2011; **Accepted:** February 28, 2012; **Published:** April 2, 2012

**Copyright:** © 2012 Nanbara et al. This is an open-access article distributed under the terms of the Creative Commons Attribution License, which permits unrestricted use, distribution, and reproduction in any medium, provided the original author and source are credited.

**Funding:** This study was supported by Grant-in-Aid for Scientific Research 21390553, grant from Global Center of Excellence (GCOE) Program, International Research Center for Molecular Science in Tooth and Bone Diseases Program, from the Ministry of Education, Culture, Sports, Science, and Technology of Japan; the National Research Council of Thailand (NRCT); Japan Society for the Promotion of Science (JSPS) grant, JSPS Invitation Fellowship for Research in Japan (NW), and Khon Kaen University grant. <http://www.mext.go.jp/>. The funders had no role in study design, data collection and analysis, decision to publish, or preparation of the manuscript.

**Competing Interests:** The authors have declared that no competing interests exist.

\* E-mail: freude@med.uoeh-u.ac.jp

<sup>‡a</sup> Current address: Department of Periodontology and Endodontology, Health Sciences University of Hokkaido, Hokkaido, Japan

<sup>‡b</sup> Current address: Department of Preventive Dentistry, School of Dental Medicine, University of Geneva, Geneva, Switzerland

<sup>‡c</sup> Current address: Clinical Research Center for Diabetes, Tokushima University Hospital, Tokushima, Japan

## Introduction

Wingless, a second chromosome recessive mutation in *Drosophila*, was first reported by Sharma and Chopra in 1975 [1]. It was characterized as a segment polarity gene in *Drosophila*, which is essential for embryonic segmentation and patterning [2]. Various homologs of the Wingless protein, termed Wnt, are involved in embryonic development, blood cell differentiation during mammalian hematopoiesis, and tumorigenesis [3]. In mammalian hematopoiesis, Wnt signaling is essential for stem-cell homeostasis [4] and lymphocyte differentiation [5,6].

Of particular interest is Wnt5a, which was first identified in the mouse [7]. It is secreted by activated antigen-presenting cells and by inflammatory synoviocytes from rheumatoid arthritis joints [8] and atherosclerotic lesions [9]. Wnt5a expression is induced by mycobacterial cell wall components and endotoxin in human antigen-presenting cells [10], and Wnt5a signaling is essential for the general inflammatory response of human macrophages during sepsis [11].

Wnt5a expression is dependent on Toll-like receptor (TLR) signaling and activation of the central inflammatory regulator NF- $\kappa$ B in human antigen-presenting cells [10]. Furthermore, inter-

leukin (IL)-6 family members activate the gp130-JAK-signal transducer and activator of transcription 3 (STAT3) signaling cascade to up-regulate Wnt5a transcription in chronic persistent inflammation and rheumatoid arthritis [12]. However, little is known about the expression and modulation of Wnt homologs in inflammatory settings, such as periodontitis.

Periodontal diseases are infections caused by gram negative periodontopathic bacteria [13] which colonize on the tooth surface at or below the gingival margin. In severe cases, these are accompanied by inflammation of the gingiva and destruction of periodontal tissues, leading to alveolar bone loss. Periodontopathic bacteria produce many virulence factors, such as lipopolysaccharide (LPS) and peptidoglycan those induce host immune responses, including the production of inflammatory cytokines. High levels of several inflammatory cytokines, such as IL-1 $\alpha$ , IL-1 $\beta$ , IL-6, interferon- $\gamma$  (IFN- $\gamma$ ), and tumor necrosis factor  $\alpha$  (TNF- $\alpha$ ), have been found in the tissue and gingival crevicular fluid of patients with advanced periodontitis [14,15]. These inflammatory cytokines are reported to stimulate the production of receptor activator for nuclear factor  $\kappa$ B ligand (RANKL) [16,17], which binds to receptor activator for nuclear factor  $\kappa$ B (RANK) on the surface of preosteoclasts. This binding stimulates both the differentiation of osteoclast progenitors and the activity of mature osteoclasts leading to alveolar bone resorption [18–21].

The purpose of this study was to evaluate the levels of Wnt5a expression in chronic periodontitis tissue and investigate the modulation of Wnt5a expression by periodontopathic bacteria. We show that Wnt5a mRNA was significantly up-regulated in chronic periodontitis tissue when compared to non-periodontitis tissue. The expression of Wnt5a was dependent on the NF- $\kappa$ B pathway and was partly mediated by the STAT1 signaling pathway in response to *P. gingivalis* LPS/IFN- $\gamma$  in the human monocytic cell line THP-1. This result suggests that the modulation of Wnt5a expression by *P. gingivalis* may play an important role in the periodontal inflammatory process.

## Results

### Wnt5a was significantly up-regulated in chronic periodontitis tissues

Wnt5a signaling is known to be essential for the general inflammatory response [11] and it is secreted in chronic inflamed site such as inflammatory synoviocytes [8], the atherosclerotic lesions [9], and the serum and bone marrow of patients with severe sepsis [11]. Table 1 summarizes the characteristics of the study subjects and sampling sites. Subjects in the periodontitis group were significantly older, and had higher mean PD, mean CAL and proportion of BOP-positive sites as compared with the control group. Production of Wnt5a mRNA was detected in all gingival tissue samples (Fig. 1). The mean relative mRNA level of Wnt5a was significantly higher in the periodontitis group ( $1.44 \pm 0.26$ ) than in the control group ( $1.00 \pm 0.22$ ;  $p < 0.001$ ). Additional regression analysis controlling for the effect of age confirmed these results that chronic periodontitis was associated with increased mRNA levels of Wnt5a ( $p < 0.001$ ).

### Wnt5a mRNA was expressed by the human monocytic cell line THP-1 in response to *P. gingivalis* LPS

The human gingival fibroblast cell line HGF-1 and the human monocytic cell line THP-1 were stimulated with *A. actinomycetemcomitans* sonicated extract, *P. gingivalis* sonicated extract, *P. gingivalis* LPS, or TNF- $\alpha$  for 4 hrs. Our results showed that the expression of Wnt5a mRNA in HGF-1 cells was constant in response to different treatments (Fig. 2A). However, in THP-1 cells, Wnt5a

**Table 1.** Characteristics of the Study Subjects.

| Characteristic                                        | Comparison group          |                                 | p-value* |
|-------------------------------------------------------|---------------------------|---------------------------------|----------|
|                                                       | Control group<br>(n = 14) | Periodontitis group<br>(n = 13) |          |
| Age in years<br>(mean $\pm$ SD)                       | 31.0 $\pm$ 13.1           | 43.5 $\pm$ 13.0                 | 0.02     |
| Female<br>n (%)                                       | 12 (85.7)                 | 10 (76.9)                       | 0.65     |
| Probing depth**<br>(mm; mean $\pm$ SD)                | 2.0 $\pm$ 0.9             | 9.5 $\pm$ 1.9                   | <0.001   |
| Clinical attachment<br>level**<br>(mm; mean $\pm$ SD) | 0.8 $\pm$ 0.7             | 10.5 $\pm$ 2.6                  | <0.001   |
| Bleeding on probing*<br>n (%)                         | 3 (21.4)                  | 13 (100)                        | <0.001   |

\*Mann-Whitney U test for continuous data, and Fisher's exact test for binary data.

\*\*Measured at the sampling sites.

doi:10.1371/journal.pone.0034434.t001

mRNA was strongly induced by *P. gingivalis* LPS but was only slightly increased by *P. gingivalis* sonicated extracts or a high concentration of TNF- $\alpha$ . Live *P. gingivalis* also significantly increased the expression of Wnt5a mRNA in THP-1 (Fig. 2E). When THP-1 cells were stimulated with various concentrations of *P. gingivalis* LPS or *E. coli* LPS (Fig. 2C), the maximum Wnt5a mRNA expression occurred after stimulation with 1  $\mu$ g/ml of *P. gingivalis* LPS. *P. gingivalis* LPS could induce more potent Wnt5a mRNA expression than *E. coli* LPS. When THP-1 cells were

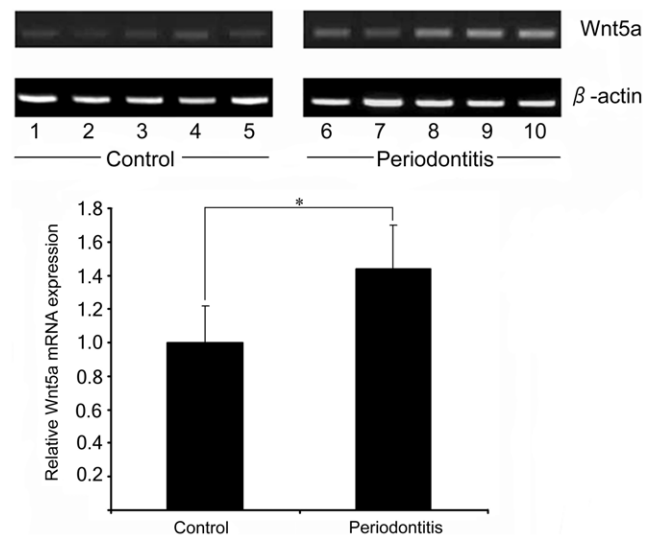

**Figure 1.** The levels of Wnt5a mRNA were significantly up-regulated in chronic periodontitis tissues. Upper panel; Total RNA was extracted from periodontitis tissues, and the expression of Wnt5a mRNA was detected by RT-PCR. PCR products were electrophoresed on a 1.5% agarose gel and visualized by UV illumination.  $\beta$ -actin served as the internal control. Results are representative of five patients (right panel). Lower panel; The relative mRNA levels of Wnt5a. The horizontal line within each box represents the median expression level in each group.

doi:10.1371/journal.pone.0034434.g001

stimulated with 1 µg/ml of *P. gingivalis* LPS for 0.5, 2, 4, 12, and 24 hrs, the maximum expression of Wnt5a mRNA occurred at 4 hrs after stimulation (Fig. 2B). Flow cytometry demonstrated that TLR2 and TLR4 were equally expressed on the surface of THP-1 cells stimulated by *P. gingivalis* LPS and *E. coli* LPS, suggesting that the expression of these receptors were not changed by the stimulation (Fig. 2D). *P. gingivalis* LPS-induced Wnt5a mRNA was significantly reduced by either TLR2 siRNA or TLR4 siRNA (Fig. 2H), suggesting that *P. gingivalis* LPS used in this study utilized both TLR2 and TLR4.

In primary human gingival fibroblasts (HGF), the expression of Wnt5a mRNA was rather constant after stimulation with *P. gingivalis* LPS (Fig. 2F). On the contrary, in primary monocytes, Wnt5a mRNA expression was significantly increased by *P. gingivalis* LPS and was reduced by using NF-κB inhibitor MG132 (Fig. 2G). These results suggest that monocytes, but not HGF, play an important role in Wnt5a up-regulation at inflamed site.

### The *P. gingivalis*-LPS induced Wnt5a expression is dependent upon NF-κB signaling

A recent study showed that Wnt5a expression is dependent on the activation of the central inflammatory regulator NF-κB [10]. We examined the degradation of IκBα in THP-1 cells stimulated with *P. gingivalis* LPS. After 30 mins or 4 hrs, whole cell lysates were subjected to Western blot. In unstimulated THP-1 cells, IκBα was abundant. In contrast, stimulation with *P. gingivalis* LPS markedly reduced the cytosolic level of IκBα (Fig. 3A). To examine *P. gingivalis* LPS-induced NF-κB activity, THP-1 cells were transfected with a luciferase reporter plasmid containing the NF-κB binding site for 18 hrs. After treatment with *P. gingivalis* LPS, the luciferase activity was measured with a luminometer. *P. gingivalis* LPS-induced NF-κB activity was significantly upregulated in THP-1 cells (Fig. 3B). Further, the ability of NF-κB to bind to DNA was analyzed by electrophoretic mobility shift assay (EMSA). The [γ-<sup>32</sup>P]-labeled probe, which contained the NF-κB binding consensus sequence, was incubated with the nuclear extract of THP-1 cells stimulated with *P. gingivalis* LPS for 40 minutes. Protein-DNA complex bands (Fig. 3C, lower arrow) were supershifted by the addition of anti-p65 antibody (Fig. 3C, upper arrow). This result suggests that *P. gingivalis* LPS is able to increase the NF-κB binding activity to DNA.

The addition of wedelolactone or IKK inhibitor VII, which act as selective irreversible inhibitors of IKKα or IKKβ kinase activities, inhibited *P. gingivalis* LPS-induced Wnt5a mRNA in a dose-dependent manner expression (Fig. 4A, 4B). Moreover, the effect of an expression vector for a dominant-negative form of IκBα was investigated. The expression of *P. gingivalis* LPS-induced Wnt5a mRNA was inhibited by transfection with a dominant-negative IκBα plasmid (Fig. 4C). Taken together, our results indicate that the induction of Wnt5a mRNA expression by *P. gingivalis* LPS is dependent upon NF-κB signaling.

### The induction of Wnt5a is partly mediated via the JAK/STAT signaling pathway

Tandem STAT3-binding sites in the *Wnt5a* gene have been identified [22]. We examined the role of the JAK/STAT pathway in the regulation of Wnt5a mRNA expression. AG490 (JAK/STAT inhibitor), fludarabine (STAT1 inhibitor), and STA21 (STAT3 inhibitor) were used to inhibit the JAK/STAT pathway 1 hr prior to *P. gingivalis* LPS stimulation. Pretreatment with either AG490 or fludarabine significantly decreased Wnt5a mRNA expression in THP-1 cells in a dose-dependent manner (Fig. 5A, B). Additionally, STAT1 siRNA was able to suppress the induction

of Wnt5a by *P. gingivalis* LPS as compared to control siRNA (Fig. 5C). However, the *P. gingivalis* LPS-induced Wnt5a mRNA expression was augmented by a STAT3 inhibitor, STA21 (Fig. 5D). Our results suggest that STAT1 positively regulated induction of Wnt5a by *P. gingivalis* LPS.

### Wnt5a mRNA expression was increased by co-stimulation with *P. gingivalis* LPS and IFN-γ

To investigate the role of the JAK/STAT pathway in detail, we examined the expression of Wnt5a mRNA after co-stimulation with *P. gingivalis* LPS and either IL-6, IFN-β, or IFN-γ. IL-6, IFN-β, or IFN-γ alone did not elicit the induction of Wnt5a mRNA when compared to the control. Wnt5a mRNA levels were up-regulated in the presence of *P. gingivalis* LPS alone. Furthermore, *P. gingivalis* LPS together with IFN-γ synergistically activated Wnt5a mRNA expression (Fig. 6A).

IFN-γ induces the phosphorylation of STAT1, which forms STAT1 homodimers. The effects of an expression vector for wild-type STAT1 on Wnt5a expression were investigated. After transfection, THP-1 cells were co-stimulated with *P. gingivalis* LPS and IFN-γ. The expression of Wnt5a mRNA was markedly increased by transfection with a wild-type STAT1 expression plasmid (Fig. 6B). Additionally, STAT1 siRNA significantly suppressed the Wnt5a mRNA expression induced by *P. gingivalis* LPS and IFN-γ (Fig. 6C). These results suggest that the induction of Wnt5a mRNA by co-stimulation with *P. gingivalis* LPS and IFN-γ is partly mediated via STAT1 signaling.

## Discussion

In this study, we investigated the levels of Wnt5a expression in chronic periodontitis tissues, and the modulation of Wnt5a expression by periodontopathic bacteria. Wnt5a mRNA was significantly up-regulated in chronic periodontitis tissues as compared to healthy control tissues. Chronic inflammatory periodontitis tissue comprises of epithelial cells, gingival fibroblasts and inflammatory cells including PMNs, monocytes and macrophages. The expression of Wnt5a was dependent upon the NF-κB signaling pathway and was partly mediated by the STAT1 signaling pathway in response to *P. gingivalis* LPS/IFN-γ in the human monocytic cell line THP-1.

Wnt5a is secreted by activated antigen-presenting cells [8,10,11] and said to be induced by *M. tuberculosis*, *M. avium*, *S. aureus* or *S. typhimurium* [10,23]. The expression of Wnt5a mRNA in response to periodontopathic bacterial stimuli was also observed in periodontal tissue cells. Whereas the expression of Wnt5a was constant in response to different treatments in HGF-1 cells, it was specifically up-regulated by *P. gingivalis* LPS and was slightly increased by *P. gingivalis* sonicated extracts in the human monocytic cell line THP-1. Sonicated extract of *P. gingivalis* comprises of various components including protein, lipid, LPS and other factors, which have different properties to stimulate host immune responses. But *P. gingivalis* LPS from InvivoGen is ultra-pure LPS (according to the manufacturer) and thus possesses a high concentration of LPS. In our study, primary cells including monocytes and gingival fibroblasts responded to *P. gingivalis* LPS in a similar manner to the cell lines (THP-1 and HGF-1).

*P. gingivalis* is considered to be an important member of the periodontopathic bacteria involved in periodontal disease [24,25] leading to inflammation and destruction of alveolar bone and the supporting connective tissue surrounding teeth. *P. gingivalis* is a gram-negative obligate anaerobic rod bacterium that has virulence factors such as LPS [24]. Although TLR4 has been reported to function as an LPS signaling receptor, *P. gingivalis* LPS is less

**A**

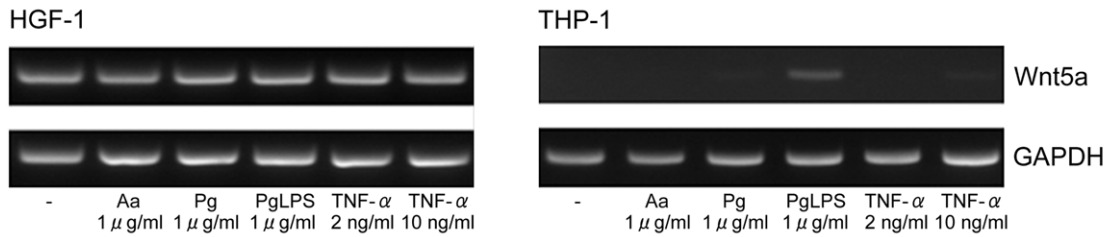

**B**

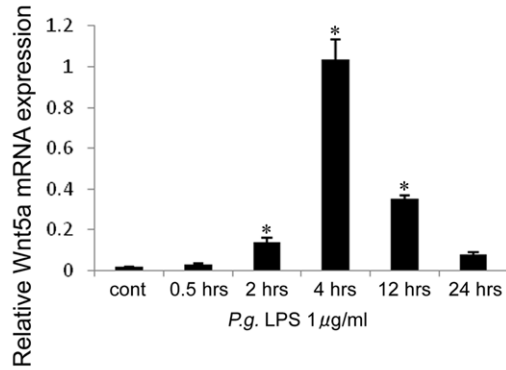

**C**

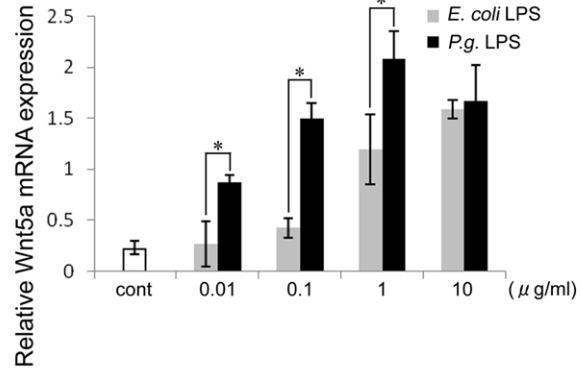

**D**

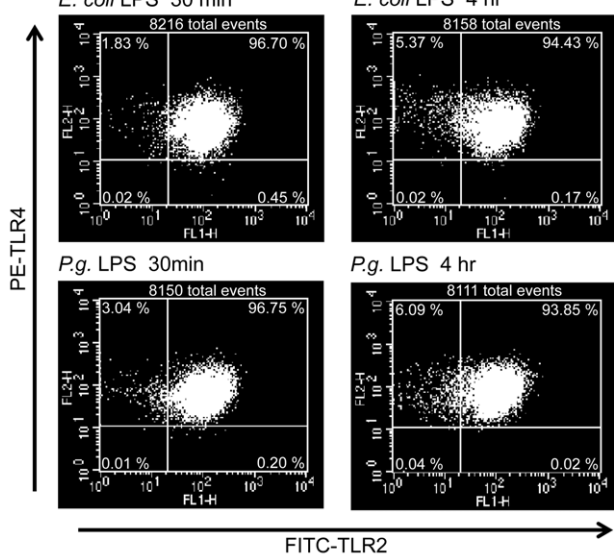

**E**

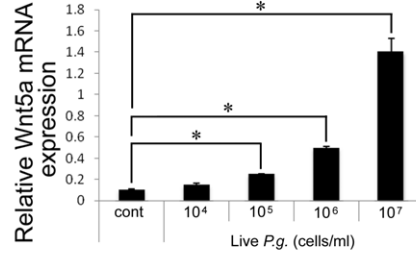

**F**

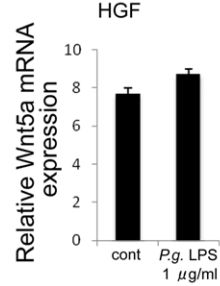

**G**

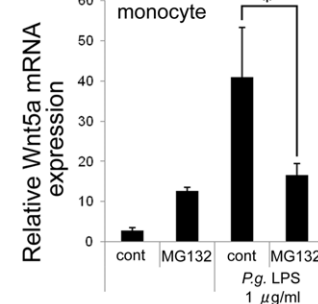

**H**

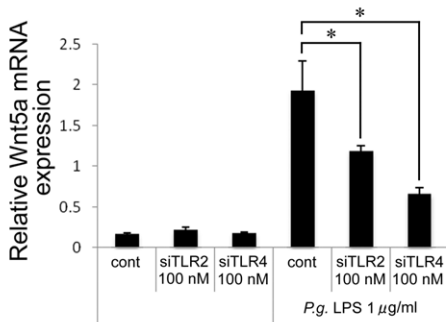

**Figure 2. Wnt5a was specifically up-regulated in THP-1 cells by *P. gingivalis* LPS.** (A) HGF-1 and THP-1 cells were stimulated with *A. actinomycetemcomitans* sonicated extract, *P. gingivalis* sonicated extract, *P. gingivalis* LPS, and TNF- $\alpha$  for 4 hrs, and the expression of Wnt5a mRNA was detected by RT-PCR. PCR products were electrophoresed on a 1.5% agarose gel and visualized by UV illumination. GAPDH served as the internal control. (B) THP-1 cells were stimulated with 1  $\mu$ g/ml of *P. gingivalis* LPS for 0.5, 2, 4, 12, or 24 hrs, and the expression of Wnt5a mRNA was detected by real-time PCR. Relative expression levels of Wnt5a are shown. (C) THP-1 cells were stimulated with 0.01–10  $\mu$ g/ml of *P. gingivalis* LPS (black bars) or *E. coli* LPS (gray bars) for 4 hrs, and then the expression of Wnt5a mRNA was detected by real-time PCR. Relative expression levels of Wnt5a are presented. (D) THP-1 cells were stimulated with *E. coli* 055:B5 LPS (middle and right upper panels) or *P. gingivalis* LPS (middle and right lower panels) for 30 min or 4 hrs, and then the expression of surface TLR2 and TLR4 protein was determined by flow cytometry. Left upper panel shows no-staining condition, and left lower panel shows un-stimulated condition with staining. (E, F, G, H) The expression of Wnt5a mRNA was detected by real-time PCR. Relative expression levels of Wnt5a mRNA are shown. (E) THP-1 cells were stimulated with  $10^4$ – $10^7$  cells/ml of live *P. gingivalis* for 4 hrs. (F, G) Primary human gingival fibroblasts (HGF) and human monocytes were stimulated with 1  $\mu$ g/ml of *P. gingivalis* LPS for 4 hrs. Monocytes were pretreated with the NF- $\kappa$ B inhibitor MG132 for 1 hr. Here we describe typical dates of three samples. (H) THP-1 cells were stimulated with *P. gingivalis* LPS for 4 hrs after being transfected with TLR2 siRNA, TLR4 siRNA or control siRNA for 72 hrs. \* $p < 0.05$ . doi:10.1371/journal.pone.0034434.g002

dependent on TLR4 signaling than *Escherichia coli* LPS [26]. Lipid A of *P. gingivalis* differs both structurally and functionally from *E. coli* lipid A [24], and *P. gingivalis* LPS utilizes either TLR2 and TLR4 to mediate inflammatory signaling [27]. Indeed, in this study, the expression of Wnt5a mRNA was down-regulated by

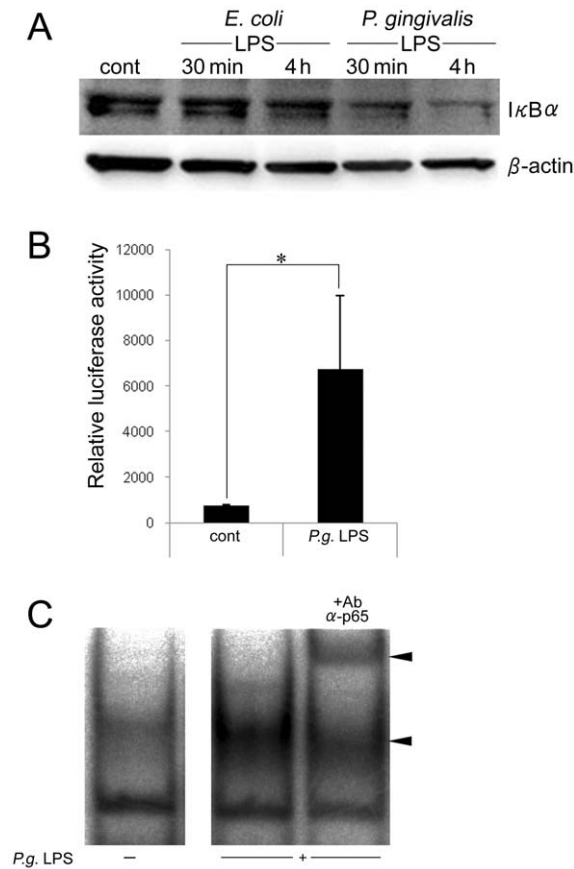

**Figure 3. Induction of Wnt5a expression is NF- $\kappa$ B dependent.** (A) THP-1 cells were stimulated with *E. coli* LPS or *P. gingivalis* LPS for 30 mins or 4 hrs. Whole cell extracts were prepared and analyzed by Western blot by using antibodies against I $\kappa$ B $\alpha$ .  $\beta$ -actin served as the protein loading control. (B) THP-1 cells were stimulated with *P. gingivalis* LPS for 4 hrs after being transfected with NF- $\kappa$ B reporter plasmid for 12 hrs, and the transcription activity was assessed by luminometer. The activity is represented by the relative luciferase activity. (C) Nuclear extracts were prepared and EMSA was performed with  $\gamma^{32}$ P-labeled oligonucleotides representing the NF- $\kappa$ B consensus sequence as a probe. Anti-p65 antibody was used for supershift assays. The lower arrow shows the DNA-protein complex, and the upper arrow shows the supershifted band. \* $p < 0.05$ . doi:10.1371/journal.pone.0034434.g003

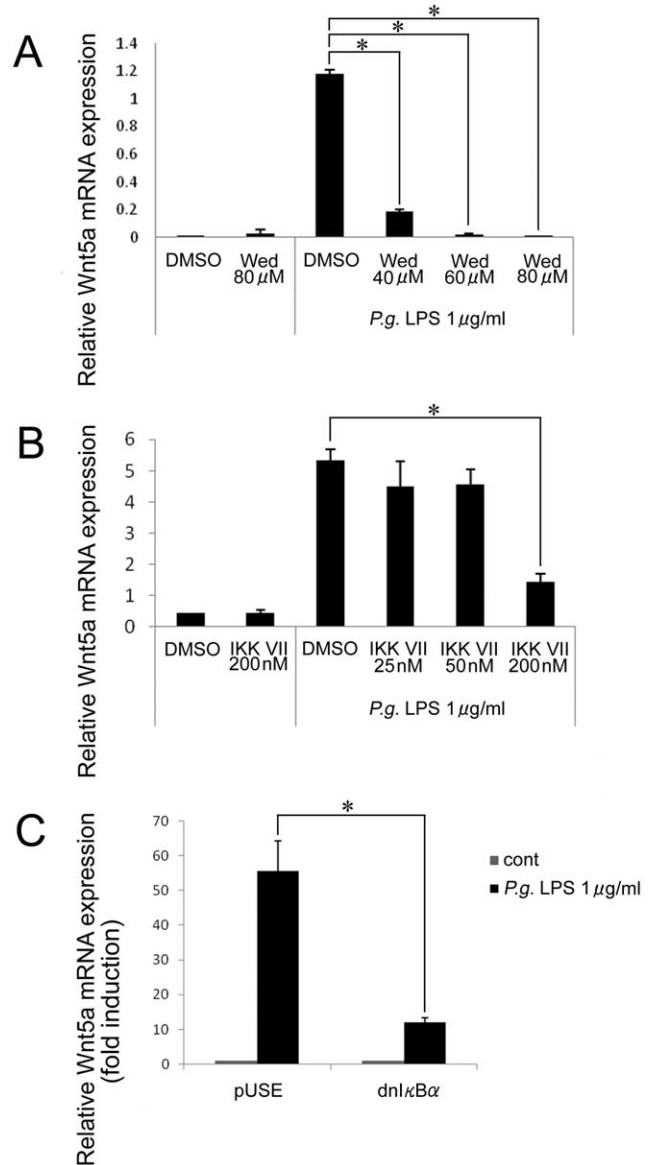

**Figure 4. *P. gingivalis* LPS-induced Wnt5a expression was inhibited by wedelolactone or dnI $\kappa$ B $\alpha$ .** (A, B) THP-1 cells were pre-treated with the IKK inhibitor wedelolactone or the IKK inhibitor VII for 1 hr. The expression of Wnt5a mRNA was detected by real-time PCR. Relative expression levels of Wnt5a are presented. DMSO is a solvent control for both inhibitors. (C) THP-1 cells were transfected with a dominant-negative form of I $\kappa$ B $\alpha$  (dnI $\kappa$ B $\alpha$ ) or the parent plasmid (pUSE) for 12 hrs. Fold induction of Wnt5a mRNA expression is shown. \* $p < 0.05$ . doi:10.1371/journal.pone.0034434.g004

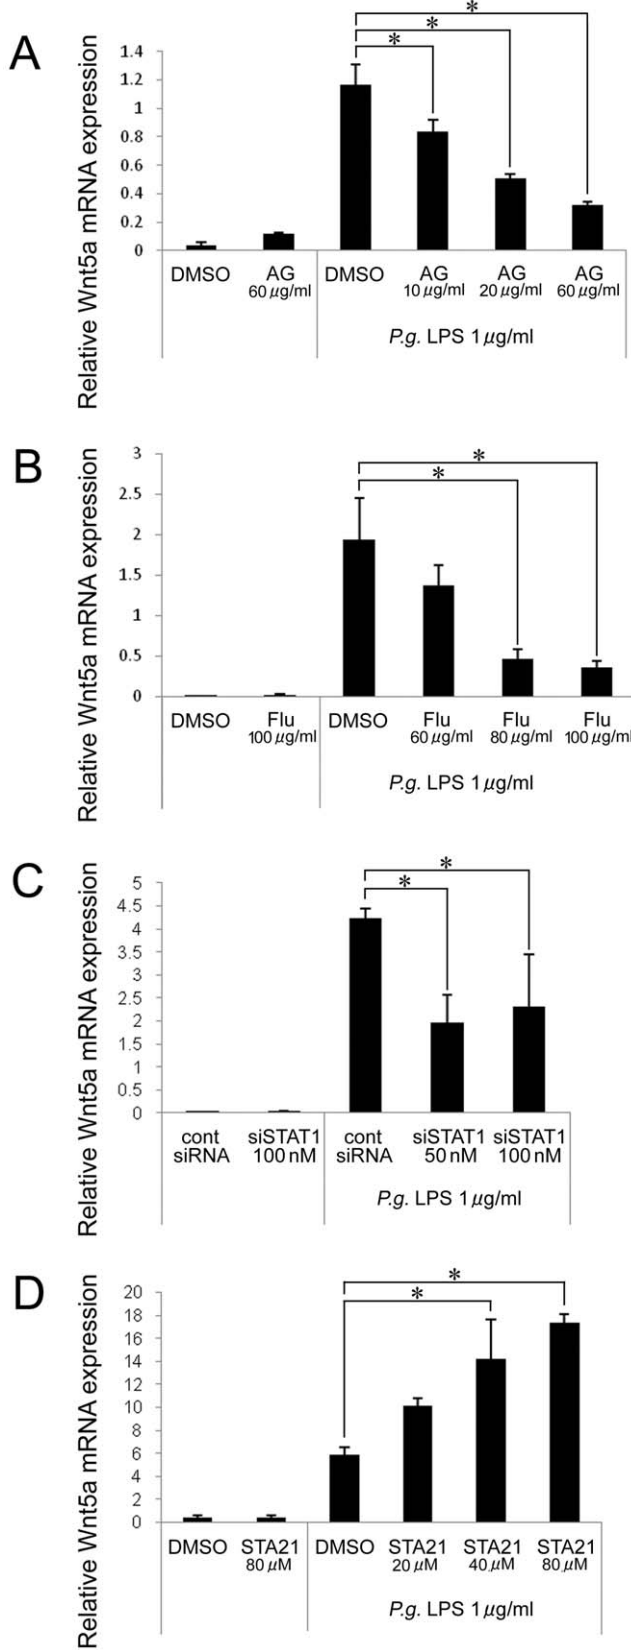

**Figure 5. Induction of Wnt5a expression is partly JAK/STAT dependent.** (A–D) The expression of Wnt5a mRNA was detected by real-time PCR. Relative expression levels of Wnt5a are presented. (A, B) THP-1 cells were pre-treated with AG490 (A) or fludarabine (B) for 1 hr

and then stimulated with *P. gingivalis* LPS for 4 hrs. DMSO is a solvent control for both inhibitors. (C) THP-1 cells were stimulated with *P. gingivalis* LPS for 4 hrs after transfection with STAT1 siRNA or control siRNA for 18 hrs. (D) THP-1 cells were pre-treated with STA21 for 1 hr and stimulated with *P. gingivalis* LPS for 4 hrs. \* $p < 0.05$ . doi:10.1371/journal.pone.0034434.g005

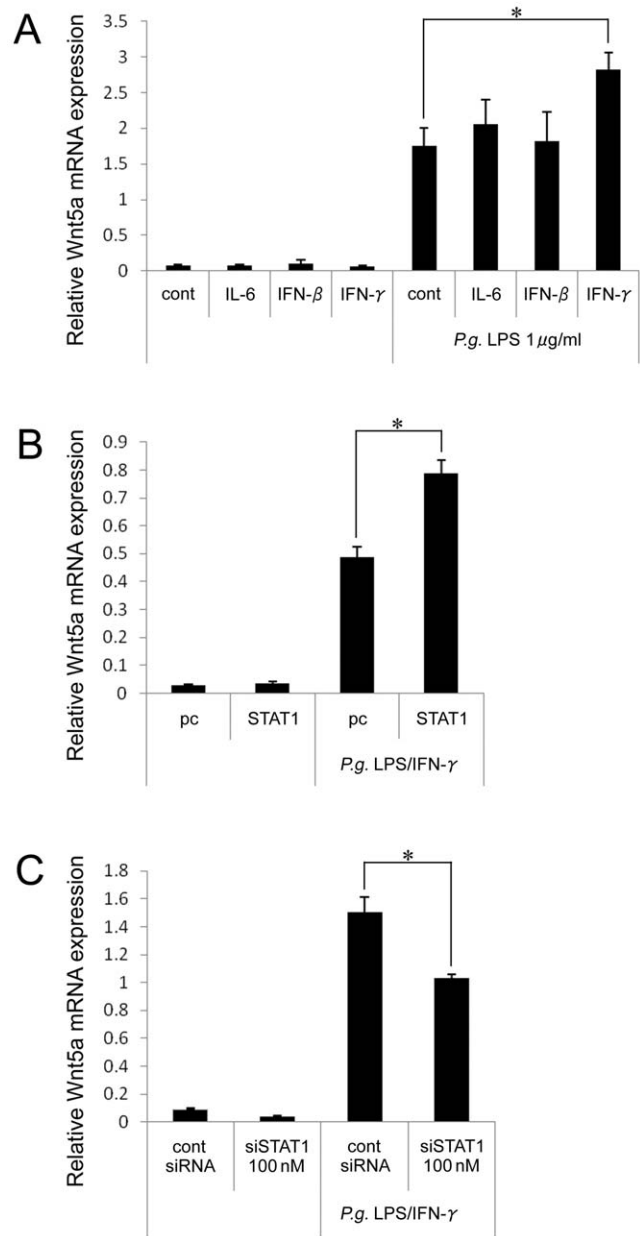

**Figure 6. The expression of Wnt5a was increased by co-stimulation with *P. gingivalis* LPS and IFN- $\gamma$ .** (A–C) The expression of Wnt5a mRNA was detected by real-time PCR. Relative expression levels of Wnt5a are presented. (A) THP-1 cells were stimulated with 10 ng/ml of IL-6, 10 ng/ml of IFN- $\beta$  or 10 ng/ml of IFN- $\gamma$  with or without *P. gingivalis* LPS for 4 hrs. (B) THP-1 cells were transfected with wild-type STAT1 expression vector or parent plasmid 12 hrs prior to stimulation with *P. gingivalis* LPS/IFN- $\gamma$  for 4 hrs. (C) THP-1 cells were stimulated with *P. gingivalis* LPS for 4 hrs after being transfected with STAT1 siRNA or control siRNA for 18 hrs. \* $p < 0.05$ . doi:10.1371/journal.pone.0034434.g006

TLR2 siRNA and TLR4 siRNA. The engagement of TLR activates a variety of intracellular signaling pathways that ultimately activate the transcriptional factor NF- $\kappa$ B [28]. In this study, the expression of Wnt5a mRNA induced by *P. gingivalis* LPS was higher than the expression induced by *E. coli* LPS. However, the expression of TLR2 and TLR4 receptors on the surface of THP-1 cells was not changed after stimulation with *P. gingivalis* LPS or *E. coli* LPS. These results suggest that the difference in Wnt5a mRNA expression level between *P. gingivalis* LPS and *E. coli* LPS is not dependent upon the expression of TLR. Generally, activated NF- $\kappa$ B induces I $\kappa$ B $\alpha$  de novo, then I $\kappa$ B $\alpha$  will be comparable level to no stimulation as seen in *E. coli* LPS (Fig. 3A). It is not clear but there might be some involvement in strong induction of Wnt5a by *P. gingivalis* LPS in comparison with *E. coli* LPS. In addition, *P. gingivalis* LPS is said to induce lower IL-10 than *E. coli* LPS in dendritic cells generated from human peripheral monocytes [29] suggesting that down-regulation of Wnt5a by *P. gingivalis* LPS-induced IL-10 may be weaker than *E. coli* LPS.

In this study, we found that AG490 and Fludarabine, but not STA21, were capable of suppressing *P. gingivalis* LPS-mediated Wnt5a up-regulation in THP-1 cells. Fludarabine is used in the treatment of various hematological malignancies, particularly B-cell chronic lymphocytic leukemia. It has also been shown that Fludarabine reduces STAT1 phosphorylation and suppresses STAT1 protein and transcript levels [30,31]. On the other hand, the expression of Wnt5a was significantly augmented by pretreatment with STA21 compared to *P. gingivalis* LPS alone. This suggests that STAT3 plays some role in the expression of Wnt5a.

Wnt5a might be up-regulated by *P. gingivalis* LPS and IFN- $\gamma$  via NF- $\kappa$ B and STAT1 pathways, and induce various cellular functions. Wnt5a activates the non-canonical pathway which results in up-regulation of inflammatory cytokines such as IL-6, IL-8, IL-1 $\beta$  and MIP-1 $\beta$  [11] and these cytokines ultimately induce bone resorption [16,17]. Moreover, increased levels of Wnt5a and cytokines may affect other mono nuclear cells including T-cells leading to sustained inflammation [10] and affect surrounding resident tissue cells, including vascular smooth muscle cells and endothelial cells [32–34]. Taken together, Wnt5a may play an important role in periodontal inflammation.

Inflammatory reactions are regulated by cytokines. IFN- $\gamma$  orchestrates immune response cross-talk with other cytokines or extracellular stimuli such as LPS. For example, pro-inflammatory genes such as inducible nitric-oxide synthase [35,36] and intercellular adhesion molecule 1 [37] were induced by co-stimulation with IFN- $\gamma$  and LPS. Here, we also show a synergistic effect of *P. gingivalis* LPS and IFN- $\gamma$  but not IL-6 or type I IFN (IFN- $\beta$ ) on Wnt5a expression in the human monocytic cell line THP-1. These synergistic effects might be mediated by transcription factors such as NF- $\kappa$ B and STAT1, although additional experiments are needed. Ohmori et al. demonstrated a synergistic effect of NF- $\kappa$ B and STAT1 on iNOS gene induction in Raw264 cells that was activated by LPS or IFN- $\alpha$ , respectively [36]. On the contrary, in our system, we could not observe a synergistic effect of LPS and IFN- $\alpha$  on Wnt5a induction, suggesting that the autocrine loop of LPS-induced IFN- $\alpha$  is not involved in Wnt5a induction. Previously, we reported that NF- $\kappa$ B and STAT3 co-operative role on several genes [38]. In this paper, we used a pharmacological approach to examine STAT3 involvement in Wnt5a induction. Unexpectedly, an inhibitor of STAT3 increased the Wnt5a mRNA level. Furthermore, STAT3 phosphorylation was not observed until 4 hrs after stimulation in THP-1 cells (data not shown). These results suggest that STAT3 does not positively

regulate Wnt5a expression, while it is still unclear if STAT3 plays a role as a negative regulator. The relationship between Wnt5a and STAT3 is cell specific [22,39]. We conclude that Wnt5a gene expression is regulated by NF- $\kappa$ B and STAT1 with different regulatory mechanisms.

## Materials and Methods

### Study population, clinical examination, and sampling of gingival tissue

The Khon Kaen University review committee approved the protocol for human subjects. Twenty-seven subjects were enrolled in this study. All subjects had at least 10 natural teeth and were systemically healthy. After having signed informed consent forms, samples of gingival tissues were obtained from 14 periodontally healthy individuals (control group) and 13 patients with generalized moderate to severe chronic periodontitis [40] during extraction of teeth. Each subject had at least one tooth which was planned for extraction due to severe periodontal destruction and inflammation (chronic periodontitis patient) or for orthodontic treatment or crown lengthening procedure (control subject). The PD, CAL, and bleeding on probing (BOP) of the sampling sites were evaluated using a periodontal probe (Hu-Friedy, Leimen, Germany).

### Human monocyte and human gingival fibroblast

The Tokyo Medical and Dental University review committee approved the protocol for human subjects. After acquiring informed consent, peripheral blood was obtained by venipuncture from 3 healthy volunteers. Peripheral blood mononuclear cells (PBMCs) were isolated by density-gradient centrifugation using Lymphoprep (Axis-Shield, Oslo, Norway). Monocytes were purified by using the MACS Monocyte Isolation Kit II (Miltenyi Biotec, Bergisch Gladbach, Germany). Human gingival fibroblasts (HGF) were isolated from three systemically healthy patients with periodontitis. Three healthy gingival samples were collected during flap surgery. The washed explants were placed in a sterile dish and minced into smaller pieces with a sterile scalpel blade. Attempts were made to remove the epithelium and leave only connective tissue. Fibroblastic cells were allowed to grow out from the explant at 37°C in a humidified atmosphere with 5% CO<sub>2</sub> in the air until they formed a confluent layer, at which point they were subcultured. Cells subcultured to the fifth passage.

### Cell culture

The human monocytic cell line THP-1 and the human gingival fibroblast cell line HGF-1 were obtained from the American Type Culture Collection (ATCC, Rockville, MD). THP-1 cells and HGF-1 cells were cultured in RPMI 1640 (Lonza, Basel, Switzerland) and DMEM (ATCC) supplemented with 10% heat-inactivated fetal bovine serum (FBS, Hyclone, Logan, UT) and 1% antibiotics (100 U/ml of penicillin and 100  $\mu$ g/ml of streptomycin). All cells were grown at 37°C in a humid incubator with 5% CO<sub>2</sub>.

### Bacteria, reagents, and antibodies

*Aggregatibacter actinomycetemcomitans* ATCC 43718 and *Porphyromonas gingivalis* 381 were cultured, and sonicated extracts were prepared as described previously [41]. Live *P. gingivalis* 381 (kindly gifted from Dr. Takeuchi), *P. gingivalis* LPS (InvivoGen, San Diego, CA), *E. coli* 055:B5 LPS (Sigma, Taufkirchen, Germany), IL-6, IFN- $\beta$ , and IFN- $\gamma$  (R&D systems, Minneapolis, MN) were purchased from the respective companies. Unless otherwise stated, *A. actinomycetemcomitans* and *P. gingivalis* were added to cell cultures



at a final concentration of 1 µg/ml. TNF- $\alpha$  was added at a final concentration of 2 ng/ml or 10 ng/ml. IL-6, IFN- $\beta$ , and IFN- $\gamma$  were added at a final concentration of 10 ng/ml.

In some experiments, specific signal transduction inhibitors for JAK/STAT (AG490, Calbiochem, San Diego, CA), STAT1 (fludarabine, WAKO, Osaka, Japan), STAT3 (STA21, Santa Cruz Biotechnology, Santa Cruz, CA), NF- $\kappa$ B (MG132, Calbiochem) and IKK (wedelolactone, IKK inhibitor VII, Calbiochem) were added 1 hr prior to stimulation with *P. gingivalis* LPS. When necessary, inhibitors were diluted in DMSO or ethanol. Cell viability was measured by using the Cell Counting Kit-8 (DOJINDO, Kumamoto, Japan). To all unstimulated and control samples, equal amounts of inhibitor solvent were added. Neither DMSO nor ethanol at the concentrations used to prepare inhibitors affected THP-1 cell viability (data not shown).

Antibody for inhibitor  $\kappa$ B $\alpha$  (IkB $\alpha$ , sc-371) was purchased from Santa Cruz Biotechnology (Santa Cruz). Anti- $\beta$ -actin antibody (A5441) was generated by Sigma. HRP-conjugated anti-rabbit IgG (#458) and HRP-conjugated anti-mouse IgG (NA931VS) were purchased from MBL (Nagoya, Japan) and Amersham Pharmacia Bioscience (Buckinghamshire, U.K.).

### RNA extraction and RT-PCR

Total RNA from gingival tissues and cells was isolated by using an RNeasy Mini kit (Qiagen) according to the manufacturer's instructions, and concentrations were measured by spectrophotometry. RNA quality was assessed by measuring the ratio of absorbance at 260 nm to the absorbance at 280 nm. Reverse transcription-polymerase chain reaction (RT-PCR) was performed with an RT-PCR kit (One-step RT-PCR kit, Qiagen) using a thermal cycler (GeneAmp<sup>®</sup> PCR system 2400, Perkin Elmer, Roche, NJ, USA). Specific oligonucleotides were synthesized (Qiagen) based on the published sequences of Wnt5a, forward 5' TTT TTC TCC TTC GCC CAG GTT GT 3', reverse 5' GGC TCA TGG CGT TCA CCA C 3';  $\beta$ -actin, forward 5' TGA CGG GGT CAC CCA CAC TGT GCC CAT CTA 3', reverse, 5' CTA GAA GCA TTT GCG GTG GAC GAT GGA GGG-3'; and GAPDH forward, 5' ACC ACA GTC CAT GCC ATC AC 3', reverse 5' ACC ACC CTG TTG CTG TA 3'. Real-time RT-PCR was performed with a QuantiTect PrimerAssay and SYBR Green PCR Master Mix (Qiagen) with LightCycler technology (Roche Diagnosis, Mannheim, Germany) and StepOne (Applied Biosystems, Foster City, CA). Wnt5a mRNA expression was displayed as relative expression normalized to  $\beta$ -actin or GAPDH.

### Flow cytometry

Cell surface expression of TLR2 and TLR4 on THP-1 cells was determined by flow cytometry. After washing, cells were stained with FITC anti-mouse/human TLR2 (Abcam, Cambridge, UK) and PE anti-human TLR4 (eBioscience, San Diego, CA). Data were analyzed by the FACS Calibur (Becton Dickinson, San Jose, CA).

### Western blotting

THP-1 cells were lysed with RIPA lysis buffer (1% Nonidet P-40, 0.5% sodium deoxycholate, 0.1% SDS, and protease inhibitor cocktail) for preparation of whole cell extracts. Equivalent amounts of protein (10 µg) were resolved on SDS-PAGE gels, transferred and immobilized on nitrocellulose membranes (Amersham, Little

Chalfont, UK), and probed with appropriate primary and secondary antibodies.

### Transfection and luciferase assay

THP-1 cells were transfected with the transfection reagent Lipofectamine<sup>TM</sup>2000 (Invitrogen, Carlsbad, CA) at 3 µl of reagent per one µg of DNA as previously reported [38]. IkB dominant-negative vectors (S32A, S36A double mutant) and pUSE control vectors were obtained from Upstate Biotechnology (Lake Placid, NY). STAT1 vectors were constructed by inserting PCR-amplified STAT1 cDNA fragments into the pcDNA3.1 expression vector (Invitrogen). All plasmids for transfections were prepared by means of the EndoFree Plasmid Maxi Kit (Qiagen). NF- $\kappa$ B luciferase reporter construct [38] and expression vectors were added to 90% confluent cells in 24-well culture plates. At 18 hrs after transfection, cells were stimulated with *P. gingivalis* LPS. After an additional 4 hrs of incubation, the cells were lysed with Passive Lysis Buffer (Promega, Madison, WI). Luciferase activity was measured by using a luminescencer-JNR-II.

### siRNA transfection

RNA interference for STAT1 (Cell Signaling, Danvers, MA), TLR2, TLR4 (Santa Cruz) and negative control siRNA (Cell Signaling) were used. STAT1 siRNA (Cell Signaling, Danvers, MA) and negative control siRNA (Cell Signaling) were used. THP-1 cells were transfected with Lipofectamine<sup>TM</sup> RNAiMAX Reagent (Invitrogen) according to the manufacturer's protocol and incubated for 18 hrs. A 42% knockdown of STAT1 mRNA was measured. Following transfection, THP-1 cells were stimulated with *P. gingivalis* LPS for 4 hrs.

### Electrophoretic mobility-shift assay (EMSA)

EMSA was performed as described previously [38]. Cells were lysed with NucBuster protein Extraction Kit according to the manufacturer's instructions (Novagen, Darmstadt, Germany). Murine NF- $\kappa$ B oligonucleotide, 5'-AGTTGAGGGGACTTTC-CAGGC-3', was purchased from Promega. Ten µg of extract was pre-incubated for 20 min at room temperature in 15 µl of buffer (10 mM Tris-HCl pH 7.5, 1 mM EDTA, 1 mM  $\beta$ -mercaptoethanol, 4% glycerol, and 40 mM NaCl) containing 1 µg of poly (dI-dC) and the oligonucleotide labeled with T4 polynucleotide kinase (New England Biolabs, Beverly, MA) and [ $\gamma$ -<sup>32</sup>P]ATP (111 TBq mmol<sup>-1</sup>, Amersham Pharmacia Biotech, Little Chalfont, UK). Protein-DNA complexes were resolved on 4% TBE polyacrylamide gels and analyzed with a specific antibody.

### Statistical analysis

Data are represented as means  $\pm$  SD for replicate experiments. The Mann-Whitney U test was used to compare the Wnt5a/ $\beta$ -actin ratios between periodontitis tissue and non-periodontitis tissue. Data were subjected to one-way analysis of variance (ANOVA) using StatView. Fisher's prospected least significance test was used for the post hoc comparison of specific groups. A value of  $p < 0.05$  was considered statistically significant.

### Author Contributions

Conceived and designed the experiments: NW TN YY YI. Performed the experiments: HN RY. Analyzed the data: WP. Contributed reagents/materials/analysis tools: YB HK JK DH JAB. Wrote the paper: HN.

### References

- Sharma RP, Chopra VL (1976) Effect of the Wingless (wg1) mutation on wing and haltere development in *Drosophila melanogaster*. *Dev Biol* 48: 461–465.
- Klingensmith J, Nusse R (1994) Signaling by wingless in *Drosophila*. *Dev Biol* 166: 396–414.



3. Nusse R (2005) Wnt signaling in disease and in development. *Cell Res* 15: 28–32.
4. Reya T, Duncan AW, Ailles L, Domen J, Scherer DC, et al. (2003) A role for Wnt signalling in self-renewal of haematopoietic stem cells. *Nature* 423: 409–414.
5. Reya T, O'Riordan M, Okamura R, Devaney E, Willert K, et al. (2000) Wnt signaling regulates B lymphocyte proliferation through a LEF-1 dependent mechanism. *Immunity* 13: 15–24.
6. Staal FJ, Clevers HC (2003) Wnt signaling in the thymus. *Curr Opin Immunol* 15: 204–208.
7. Gavin BJ, McMahon AP (1992) Differential regulation of the Wnt gene family during pregnancy and lactation suggests a role in postnatal development of the mammary gland. *Mol Cell Biol* 12: 2418–2423.
8. Sen M, Lauterbach K, El-Gabalawy H, Firestein GS, Corr M, et al. (2000) Expression and function of wingless and frizzled homologs in rheumatoid arthritis. *Proc Natl Acad Sci U S A* 97: 2791–2796.
9. Christman MA, 2nd, Goetz DJ, Dickerson E, McCall KD, Lewis CJ, et al. (2008) Wnt5a is expressed in murine and human atherosclerotic lesions. *Am J Physiol Heart Circ Physiol* 294: H2864–2870.
10. Blumenthal A, Ehlers S, Lauber J, Buer J, Lange C, et al. (2006) The Wingless homolog WNT5A and its receptor Frizzled-5 regulate inflammatory responses of human mononuclear cells induced by microbial stimulation. *Blood* 108: 965–973.
11. Pereira C, Schaefer DJ, Bachli EB, Kurrer MO, Schoedon G (2008) Wnt5A/CaMKII signaling contributes to the inflammatory response of macrophages and is a target for the antiinflammatory action of activated protein C and interleukin-10. *Arterioscler Thromb Vasc Biol* 28: 504–510.
12. Katoh M (2007) STAT3-induced WNT5A signaling loop in embryonic stem cells, adult normal tissues, chronic persistent inflammation, rheumatoid arthritis and cancer (Review). *Int J Mol Med* 19: 273–278.
13. Costerton JW, Stewart PS, Greenberg EP (1999) Bacterial biofilms: a common cause of persistent infections. *Science* 284: 1318–1322.
14. Bickel M, Axtelius B, Solioz C, Attstrom R (2001) Cytokine gene expression in chronic periodontitis. *J Clin Periodontol* 28: 840–847.
15. Rasmussen L, Hanstrom L, Lerner UH (2000) Characterization of bone resorbing activity in gingival crevicular fluid from patients with periodontitis. *J Clin Periodontol* 27: 41–52.
16. Hofbauer LC, Lacey DL, Dunstan CR, Spelsberg TC, Riggs BL, et al. (1999) Interleukin-1beta and tumor necrosis factor-alpha, but not interleukin-6, stimulate osteoprotegerin ligand gene expression in human osteoblastic cells. *Bone* 25: 255–259.
17. Nakashima T, Kobayashi Y, Yamasaki S, Kawakami A, Eguchi K, et al. (2000) Protein expression and functional difference of membrane-bound and soluble receptor activator of NF-kappaB ligand: modulation of the expression by osteotropic factors and cytokines. *Biochem Biophys Res Commun* 275: 768–775.
18. Burgess TL, Qian Y, Kaufman S, Ring BD, Van G, et al. (1999) The ligand for osteoprotegerin (OPGL) directly activates mature osteoclasts. *J Cell Biol* 145: 527–538.
19. Hsu H, Lacey DL, Dunstan CR, Solovyev I, Colombero A, et al. (1999) Tumor necrosis factor receptor family member RANK mediates osteoclast differentiation and activation induced by osteoprotegerin ligand. *Proc Natl Acad Sci U S A* 96: 3540–3545.
20. Lacey DL, Timms E, Tan HL, Kelley MJ, Dunstan CR, et al. (1998) Osteoprotegerin ligand is a cytokine that regulates osteoclast differentiation and activation. *Cell* 93: 165–176.
21. Matsuzaki K, Udagawa N, Takahashi N, Yamaguchi K, Yasuda H, et al. (1998) Osteoclast differentiation factor (ODF) induces osteoclast-like cell formation in human peripheral blood mononuclear cell cultures. *Biochem Biophys Res Commun* 246: 199–204.
22. Fujio Y, Matsuda T, Oshima Y, Maeda M, Mohri T, et al. (2004) Signals through gp130 upregulate Wnt5a and contribute to cell adhesion in cardiac myocytes. *FEBS Lett* 573: 202–206.
23. Bansal K, Trinath J, Chakravorty D, Patil SA, Balaji KN (2011) Pathogen-specific TLR2 protein activation programs macrophages to induce Wnt-beta-catenin signaling. *J Biol Chem* 286: 37032–37044.
24. Holt SC, Ebersole JL (2005) *Porphyromonas gingivalis*, *Treponema denticola*, and *Tannerella forsythia*: the “red complex”, a prototype polybacterial pathogenic consortium in periodontitis. *Periodontol* 2000 38: 72–122.
25. Loesche WJ, Grossman NS (2001) Periodontal disease as a specific, albeit chronic, infection: diagnosis and treatment. *Clin Microbiol Rev* 14: 727–752.
26. Pulendran B, Kumar P, Cutler CW, Mohamadzadeh M, Van Dyke T, et al. (2001) Lipopolysaccharides from distinct pathogens induce different classes of immune responses in vivo. *J Immunol* 167: 5067–5076.
27. Darveau RP, Arbabi S, Garcia I, Bainbridge B, Maier RV (2002) *Porphyromonas gingivalis* lipopolysaccharide is both agonist and antagonist for p38 mitogen-activated protein kinase activation. *Infect Immun* 70: 1867–1873.
28. Medzhitov R (2001) Toll-like receptors and innate immunity. *Nat Rev Immunol* 1: 135–145.
29. Kanaya S, Nemoto E, Ogawa T, Shimauchi H (2004) *Porphyromonas gingivalis* lipopolysaccharides induce maturation of dendritic cells with CD14+CD16+ phenotype. *Eur J Immunol* 34: 1451–1460.
30. Frank DA, Mahajan S, Ritz J (1999) Fludarabine-induced immunosuppression is associated with inhibition of STAT1 signaling. *Nat Med* 5: 444–447.
31. Plosker GL, Figgitt DP (2003) Oral fludarabine. *Drugs* 63: 2317–2323.
32. Cheng CW, Yeh JC, Fan TP, Smith SK, Charnock-Jones DS (2008) Wnt5a-mediated non-canonical Wnt signalling regulates human endothelial cell proliferation and migration. *Biochem Biophys Res Commun* 365: 285–290.
33. Masckauchan TN, Agalliu D, Vorontchikhina M, Ahn A, Parmalee NL, et al. (2006) Wnt5a signaling induces proliferation and survival of endothelial cells in vitro and expression of MMP-1 and Tie-2. *Mol Biol Cell* 17: 5163–5172.
34. Yang DH, Yoon JY, Lee SH, Bryja V, Andersson ER, et al. (2009) Wnt5a is required for endothelial differentiation of embryonic stem cells and vascularization via pathways involving both Wnt/beta-catenin and protein kinase Calpha. *Circ Res* 104: 372–379.
35. Lowenstein CJ, Alley EW, Raval P, Snowman AM, Snyder SH, et al. (1993) Macrophage nitric oxide synthase gene: two upstream regions mediate induction by interferon gamma and lipopolysaccharide. *Proc Natl Acad Sci U S A* 90: 9730–9734.
36. Ohmori Y, Hamilton TA (2001) Requirement for STAT1 in LPS-induced gene expression in macrophages. *J Leukoc Biol* 69: 598–604.
37. Jahnke A, Johnson JP (1994) Synergistic activation of intercellular adhesion molecule 1 (ICAM-1) by TNF-alpha and IFN-gamma is mediated by p65/p50 and p65/c-Rel and interferon-responsive factor Stat1 alpha (p91) that can be activated by both IFN-gamma and IFN-alpha. *FEBS Lett* 354: 220–226.
38. Yoshida Y, Kumar A, Koyama Y, Peng H, Arman A, et al. (2004) Interleukin 1 activates STAT3/nuclear factor-kappaB cross-talk via a unique TRAF6- and p65-dependent mechanism. *J Biol Chem* 279: 1768–1776.
39. Dissanayake SK, Olkhanud PB, O'Connell MP, Carter A, French AD, et al. (2008) Wnt5A regulates expression of tumor-associated antigens in melanoma via changes in signal transducers and activators of transcription 3 phosphorylation. *Cancer Res* 68: 10205–10214.
40. Armitage GC (1999) Development of a classification system for periodontal diseases and conditions. *Ann Periodontol* 4: 1–6.
41. Wang D, Kawashima Y, Nagasawa T, Takeuchi Y, Kojima T, et al. (2005) Elevated serum IgG titer and avidity to *Actinobacillus actinomycetemcomitans* serotype c in Japanese periodontitis patients. *Oral Microbiol Immunol* 20: 172–179.
